# Supplementary material for: Redox properties of nano-sized biochar derived from wheat straw biochar
Source: RSC Adv. 2022 Apr 8;12(18):11039–46. doi: 10.1039/d2ra01211a (PMC8992223; doi:10.1039/d2ra01211a)
Supplement: RA-012-D2RA01211A-s001 [file RA-012-D2RA01211A-s001.pdf]

**Supplementary information**

**Redox properties of nano-sized biochar derived from wheat straw biochar**

Shiyin Wu<sup>a</sup>, Xixi Cai<sup>a</sup>, Zhiyang Liao<sup>a</sup>, Wenjie He<sup>a</sup>, Junhua Shen<sup>b</sup>, Yong Yuan<sup>a\*</sup>, Xunan Ning<sup>a</sup>

<sup>a</sup> Guangzhou Key Laboratory Environmental Catalysis and Pollution Control, Guangdong Key Laboratory of Environmental Catalysis and Health Risk Control, School of Environmental Science and Engineering, Institute of Environmental Health and Pollution Control, Guangdong University of Technology, Guangzhou 510006, China

<sup>b</sup> Shaoguan Pengrui Environmental Technology Co., Ltd.

\*Corresponding author: [yuanyong@soil.gd.cn](mailto:yuanyong@soil.gd.cn)

**Figure S1**

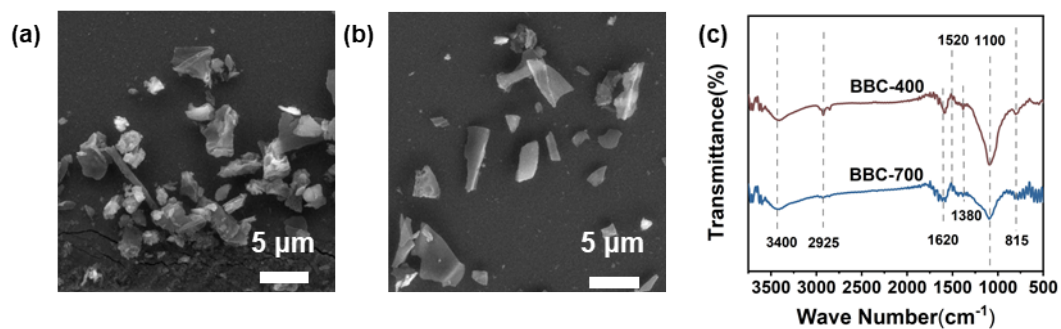

**Figure S1** (a, b) SEM images and (c) FTIR spectra of bulk-biochar-400 (BBC-400) and bulk-biochar-700 (BBC-700).

**Figure S2**

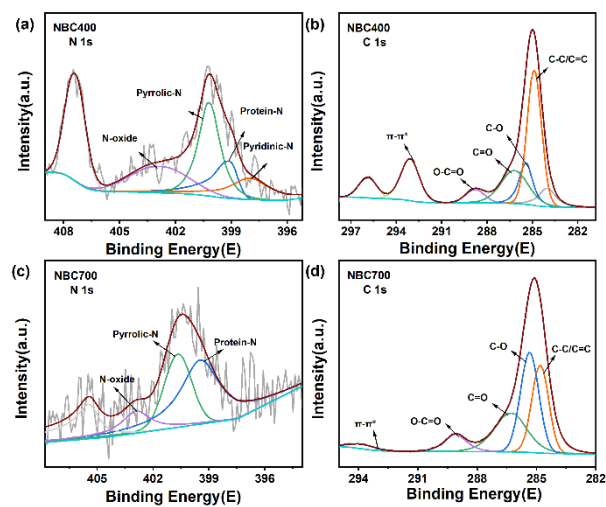

**Figure S2** N 1s and C 1s X-ray photoelectron spectroscopy (XPS) of NBC-400 (a, b) and NBC-700

(c,

d).

**Figure S3**

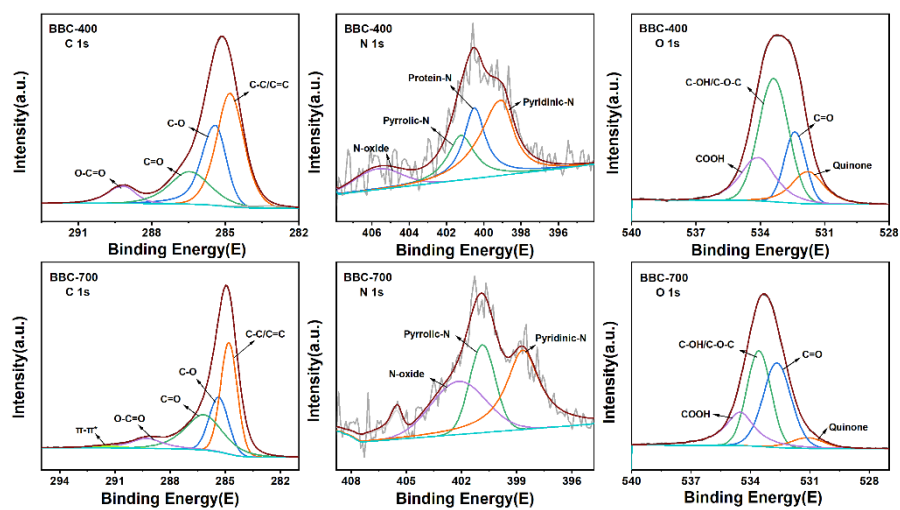

**Figure S3** O 1s, C 1s and N 1s X-ray photoelectron spectroscopy (XPS) of BBC-400 (a) and BBC-700 (b), respectively.

**Figure S4**

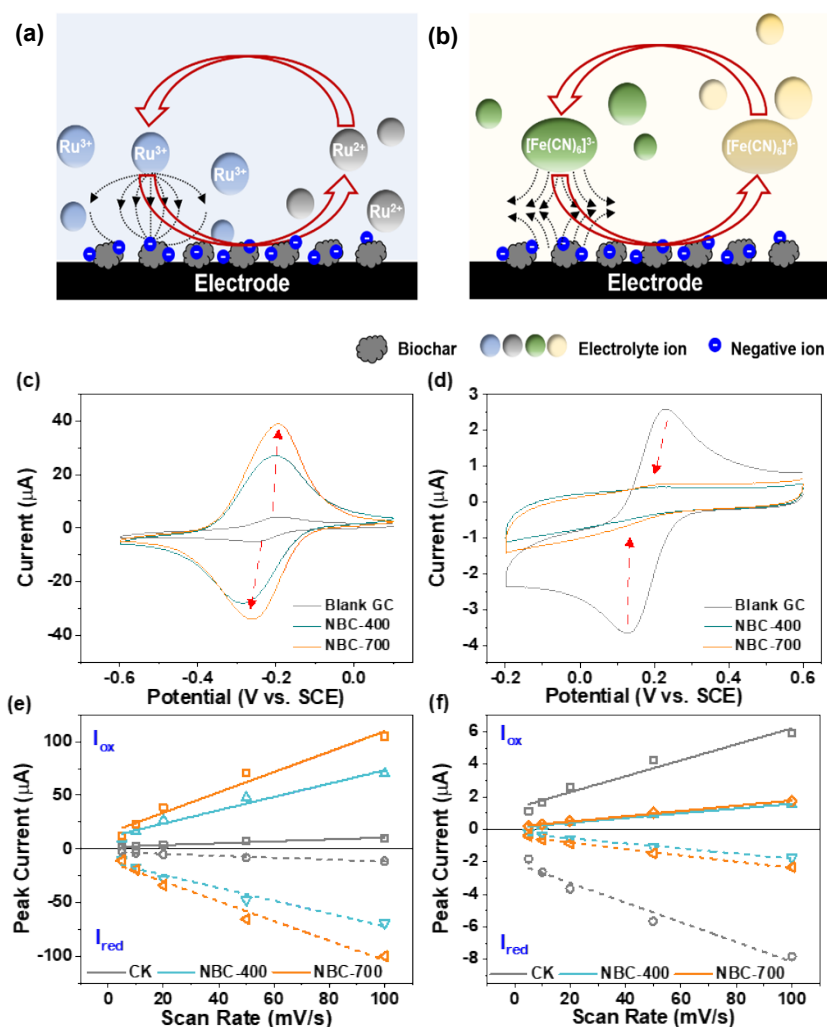

**Figure S4** (a, b) Schematic diagrams to illustrate the charge polarity of BC tested by electrochemical experiments; (c, d) CV scans of the blank glassy carbon electrode (blank GC) and GC loaded with NBC-400 and NBC-700 at scan rate of 20 mV/s in PBS with 0.5 mM hexaammineruthenium(III) chloride or 0.5 mM potassium ferricyanide; (e, f) the peak current of oxidation or reduction for reversible redox reactions of Ru<sup>3+</sup> (positive ion) and [Fe(CN)<sub>6</sub>]<sup>3-</sup> (negative ion) at various scan rates.

**Figure S5**

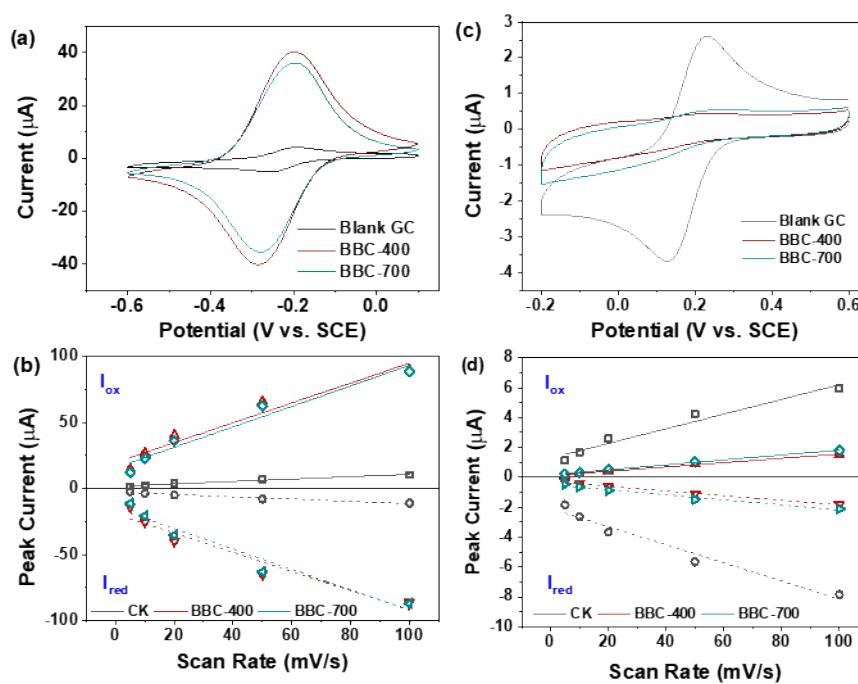

**Figure S5** (a, b) CV scans of the blank glassy carbon electrode (blank GC) and GC loaded with BBC-400 and BBC-700 at scan rate of 20 mV/s in PBS with 0.5 mM hexaammineruthenium(III) chloride or 0.5 mM potassium ferricyanide; (c, d) the peak current of oxidation or reduction for reversible redox reactions of Ru<sup>3+</sup> (positive ion) and [Fe(CN)<sub>6</sub>]<sup>3-</sup> (negative ion) at various scan rates.

**Figure S6**

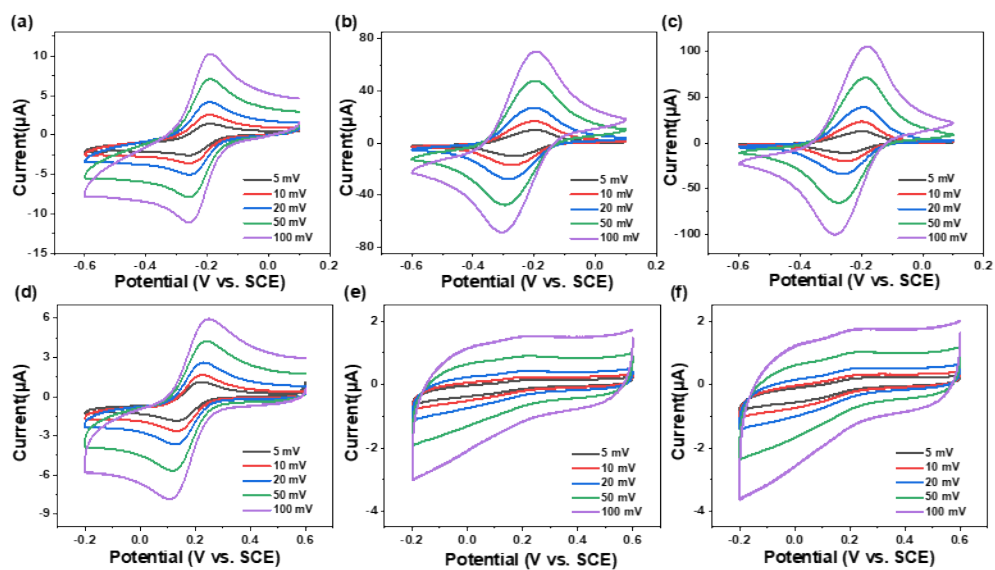

**Figure S6** CVs of blank GC, NBC-400 and NBC-700 under different scan rates (5, 10, 20, 50 and 100  $\text{mV}\cdot\text{s}^{-1}$ ) in 0.5 mM (a, b, c) hexaammineruthenium(III) chloride solution or (d, e, f) potassium ferricyanide solution.

**Figure S7**

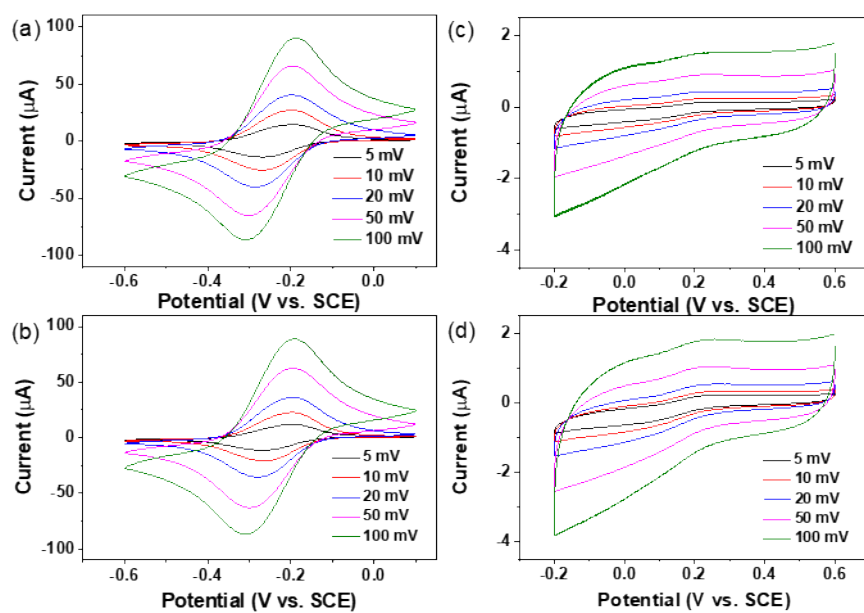

**Figure S7** CVs of BBC-400 and BBC-700 under different scan rates (5, 10, 20, 50 and 100  $\text{mV}\cdot\text{s}^{-1}$ )

in 0.5 mM (a, b) hexaammineruthenium(III) chloride solution or (c, d) potassium ferricyanide.

**Figure S8**

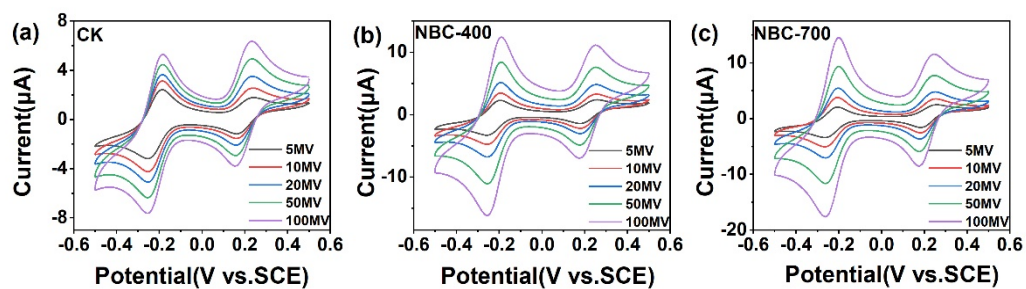

**Figure S8** (a) CV scans of CK (chitosan), (b) NBC-400 and (c) NBC-700 treatment under different scan rates (5, 10, 20, 50 and 100 mV) in PBS containing 0.5 mM  $\text{Ru}^{3+}$  and Fc.

**Figure S9**

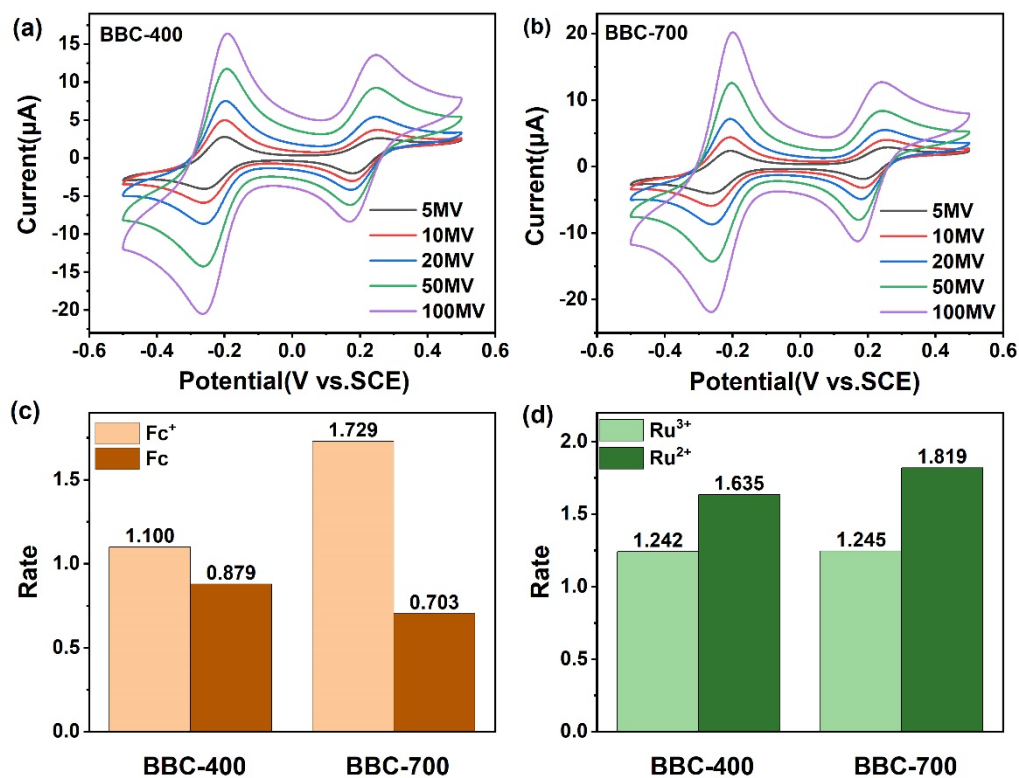

**Figure S9** CV scans of (a) BBC-400 and (b) BBC-700 treatment under different scan rates (5, 10, 20, 50 and 100 mV) in PBS containing 0.5 mM Ru<sup>3+</sup> and Fc. The amplification ratios (AR) of BCs in (c) Fc oxide, Fc<sup>+</sup> reduce and (d) Ru<sup>2+</sup> oxide, Ru<sup>3+</sup> reduce processes at scan rate of 50 mV/s.

**Figure S10**

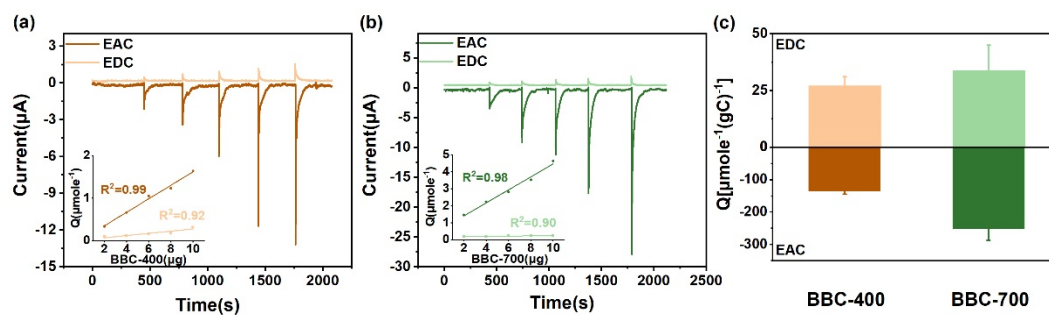

**Figure S10** (a) Reductive and oxidative current responses of BBC-400 (Inset: Linear relationship between the electron numbers and the added amounts of BBC-400); (b) reductive and oxidative current responses of BBC-700 (Inset: Linear relationship between the electron numbers and the added amounts of BBC-700); (c) electron transfer capacity of BBC-400 and BBC-700.

**Figure S11**

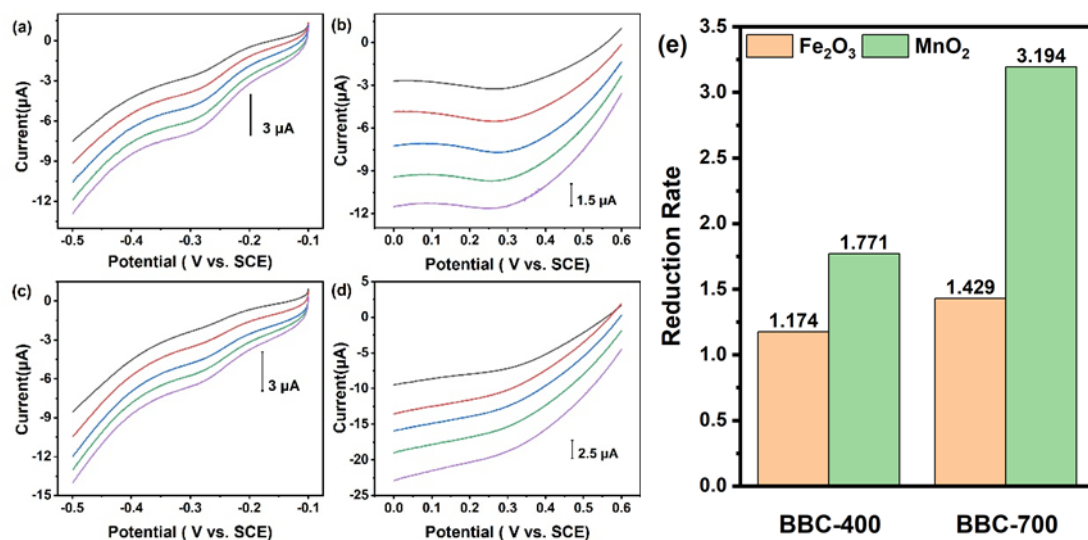

**Figure S11** Linear sweep voltammograms of hematite ( $\text{Fe}_2\text{O}_3$ ) and  $\text{MnO}_2$  on BBC-400 and BBC-700 electrode. Scan rates varied from 50 to 250  $\text{mV}\cdot\text{s}^{-1}$  with an interval of 50  $\text{mV}\cdot\text{s}^{-1}$ . and (e) the reduction rate comparison among minerals (hematite and  $\text{MnO}_2$ ) at 200  $\text{mV}/\text{s}$  scan rate.

**Figure S12**

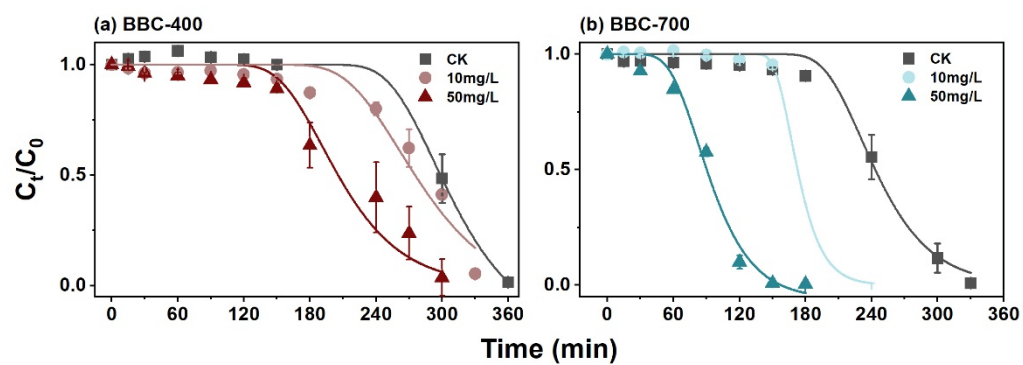

**Figure S12** Methyl orange degradation by sulfide in the absence or presence of (a) BBC-400 and (b) BBC-700 with different concentrations (10mg/L and 50mg/L).

**Figure S13**

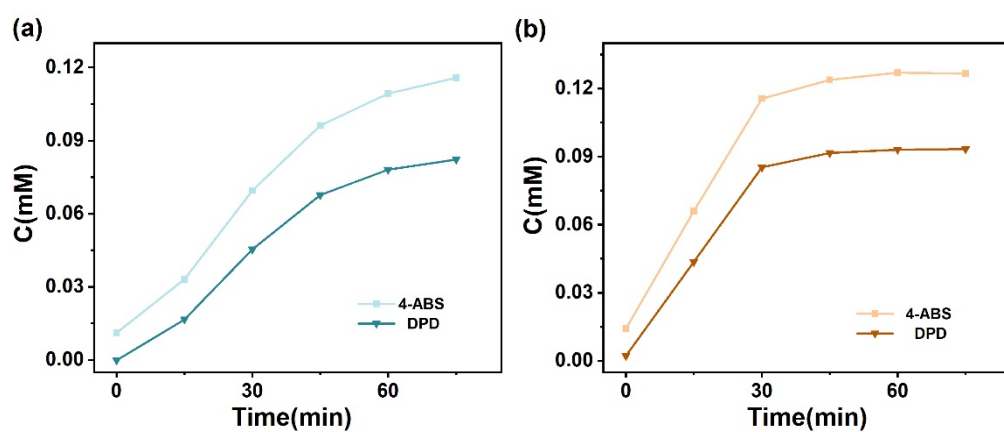

**Figure S13** The formation of intermediate products of methyl orange transformation by sulfide mediated by NBC-400 (a) or NBC-700 (b).

**Figure S14**

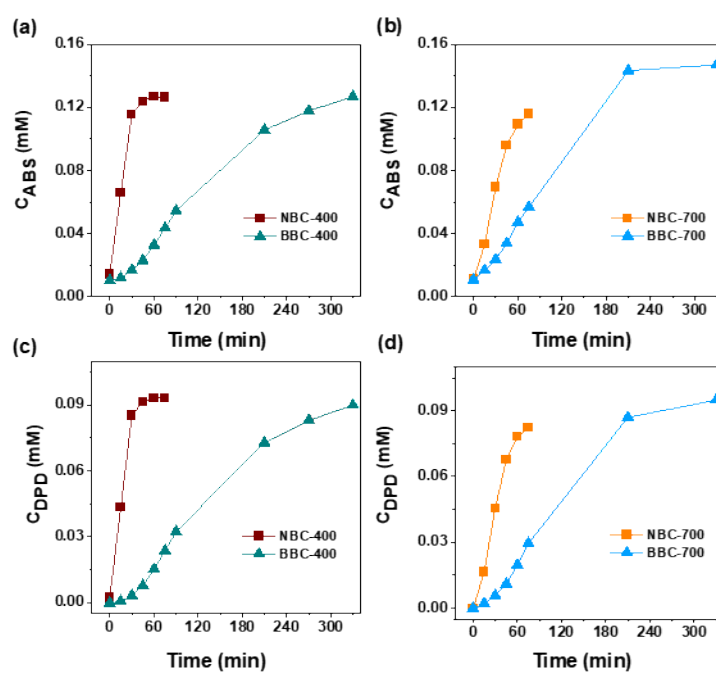

**Figure S14** Comparison of nano-biochar and bulk-biochar: the formation of intermediate products

of methyl orange transformation by sulfide mediated.

**Table S1** The information of functional groups and respective proportion (%) of bulk-biochar based on results from XPS analysis.

|             |                                          | NBC-400      | NBC-700      | BBC-400      | BBC-700      |
|-------------|------------------------------------------|--------------|--------------|--------------|--------------|
| <b>C 1s</b> | <b>C-C/C=C</b>                           | <b>37.12</b> | <b>26.4</b>  | <b>43.66</b> | <b>36.11</b> |
|             | <b>C-O</b>                               | <b>11.77</b> | <b>32.76</b> | <b>28.81</b> | <b>20.46</b> |
|             | <b>C=O</b>                               | <b>17.49</b> | <b>23.36</b> | <b>19.02</b> | <b>28</b>    |
|             | <b>COO</b>                               | <b>4.77</b>  | <b>7.32</b>  | <b>7.06</b>  | <b>7.49</b>  |
|             | <b><math>\pi</math>-<math>\pi</math></b> | <b>15.22</b> | <b>2.32</b>  | <b>0</b>     | <b>1.14</b>  |
| <b>O 1s</b> | <b>quinone</b>                           | <b>27.26</b> | <b>17.7</b>  | <b>14.01</b> | <b>5.76</b>  |
|             | <b>O=C</b>                               | <b>21.02</b> | <b>21.23</b> | <b>18.96</b> | <b>37.93</b> |
|             | <b>C-O-C/C-OH</b>                        | <b>42.78</b> | <b>50.24</b> | <b>45.97</b> | <b>36.15</b> |
|             | <b>COOH</b>                              | <b>8.94</b>  | <b>10.83</b> | <b>21.05</b> | <b>20.16</b> |
| <b>N 1s</b> | <b>Pyridinic</b>                         | <b>13.58</b> | <b>0</b>     | <b>0</b>     | <b>37.82</b> |
|             | <b>Protein</b>                           | <b>13.4</b>  | <b>42.41</b> | <b>39.56</b> | <b>0</b>     |
|             | <b>Pyrrolic</b>                          | <b>27.67</b> | <b>27.02</b> | <b>28.12</b> | <b>24</b>    |
|             | <b>quaternary</b>                        | <b>0</b>     | <b>0</b>     | <b>19.58</b> | <b>0</b>     |
|             | <b>N-oxide</b>                           | <b>18.89</b> | <b>12.16</b> | <b>12.74</b> | <b>30.82</b> |

**Table S2** Electron donating capacities (EDC), electron accepting capacities (EAC), and electron

| <b>Samples</b> | <b>Pyrolytic<br/>Temperature (°C)</b> | <b>Raw<br/>materials</b> | <b>EDC<br/>μmole<sup>-</sup>/g</b> | <b>EAC<br/>μmole<sup>-</sup>/g</b> | <b>ETC<br/>μmole<sup>-</sup>/g</b> | <b>Reference</b> |
|----------------|---------------------------------------|--------------------------|------------------------------------|------------------------------------|------------------------------------|------------------|
| NBC-400        | 400                                   | wheat                    | 27.41                              | 169.16                             | 196.57                             | This study       |
| NBC-700        | 700                                   | wheat                    | 41.21                              | 322.26                             | 363.47                             | This study       |
| BBC-400        | 400                                   | wheat                    | 27.19                              | 135.49                             | 162.68                             | This study       |
| BBC-700        | 700                                   | wheat                    | 33.91                              | 250.37                             | 284.28                             | This study       |
| Ce300          | 300                                   | cellulose                | 130                                | 40                                 | 170                                | [1]              |
| Ce500          | 500                                   | cellulose                | 120                                | 182                                | 302                                | [1]              |
| Ce700          | 700                                   | cellulose                | 100                                | 267                                | 367                                | [1]              |
| Lig300         | 300                                   | lignin                   | 23                                 | 21                                 | 44                                 | [1]              |
| Lig500         | 500                                   | lignin                   | 41                                 | 302                                | 343                                | [1]              |
| Lig700         | 700                                   | lignin                   | 36                                 | 692                                | 728                                | [1]              |
| Ca300          | 300                                   | casein                   | 7                                  | 3                                  | 10                                 | [1]              |
| Ca500          | 500                                   | casein                   | 19                                 | 41                                 | 60                                 | [1]              |
| Ca700          | 700                                   | casein                   | 5                                  | 93                                 | 98                                 | [1]              |
| St300          | 300                                   | starch                   | 10                                 | 56                                 | 66                                 | [1]              |
| St500          | 500                                   | starch                   | 44                                 | 24                                 | 68                                 | [1]              |
| St700          | 700                                   | starch                   | 194                                | 412                                | 606                                | [1]              |
| G200           | 200                                   | grass                    | 110                                | 20                                 | 130                                | [2]              |
| G300           | 300                                   | grass                    | 360                                | 40                                 | 400                                | [2]              |
| G400           | 400                                   | grass                    | 700                                | 900                                | 1600                               | [2]              |
| G500           | 500                                   | grass                    | 220                                | 770                                | 990                                | [2]              |
| G600           | 600                                   | grass                    | 100                                | 620                                | 720                                | [2]              |
| G700           | 700                                   | grass                    | 110                                | 740                                | 850                                | [2]              |
| W200           | 200                                   | wood                     | 170                                | 2                                  | 172                                | [2]              |
| W300           | 300                                   | wood                     | 200                                | 10                                 | 210                                | [2]              |
| W400           | 400                                   | wood                     | 220                                | 340                                | 560                                | [2]              |
| W500           | 500                                   | wood                     | 20                                 | 540                                | 560                                | [2]              |
| W600           | 600                                   | wood                     | 20                                 | 180                                | 200                                | [2]              |
| W700           | 700                                   | wood                     | 20                                 | 210                                | 230                                | [2]              |

transfer capacities (ETC) of biochar.

**Table S3** Estimated kinetic values for the decolorization of MO under different conditions

| Experiments           | $k$ (min <sup>-1</sup> ) | $t_0$ (min)   | R <sup>2</sup> (%) |
|-----------------------|--------------------------|---------------|--------------------|
| Control               | 0.028                    | 249.89 ± 2.15 | 0.990              |
| MO+ NBC-400 (10 mg/L) | 0.036                    | 147.91 ± 6.53 | 0.985              |
| MO+ NBC-400 (50 mg/L) | 0.115                    | 56.48 ± 0.27  | 0.999              |
| MO+ BBC-400 (10 mg/L) | 0.028                    | 212.60 ± 0.32 | 0.944              |
| MO+ BBC-400 (50 mg/L) | 0.029                    | 151.34 ± 6.65 | 0.948              |
| MO+NBC-700 (10 mg/L)  | 0.051                    | 84.98 ± 2.41  | 0.995              |
| MO+ NBC-700 (50 mg/L) | 0.154                    | 24.96 ± 0.58  | 0.999              |
| MO+ BBC-700 (10 mg/L) | 0.040                    | 151.78 ± 1.40 | 0.998              |
| MO+ BBC-700 (50 mg/L) | 0.065                    | 56.20 ± 7.53  | 0.975              |

**References:**

- [1] S. Li, L. Shao, H. Zhang, P. He and F. Lu, J Hazard Mater, 2020, 394, 122541.
- [2] L. Klupfel, M. Keiluweit, M. Kleber and M. Sander, Environ Sci Technol, 2014, 48, 5601-5611.
